# Supplementary material
Source: Springer Nature journal article supplement (https://www.springermedizin.de/resource/supplementary/12936_2013_2936_MOESM18_ESM.pdf/9544554)

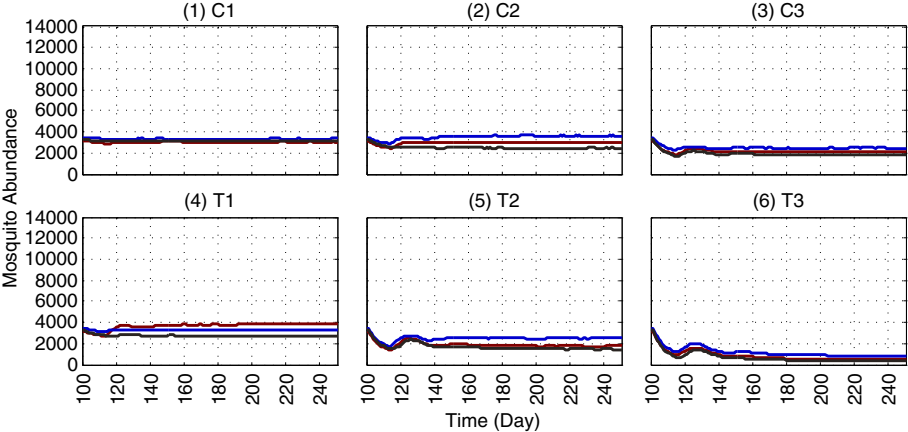

— Diagonal — Horizontal — Vertical

Supplement: MOESM18 [file 9544554]
